# Supplementary material for: Strong Activity and No Resistance Induction Exerted by Cell-Free Supernatants from Lacticaseibacillus rhamnosus against Mono-Species and Dual-Species Biofilms of Wound Pathogens in In Vivo-like Conditions
Source: MDPI journal article supplement (doi:10.3390/ijms25042087), 2024-02-08
Supplement: s1 [file s1]

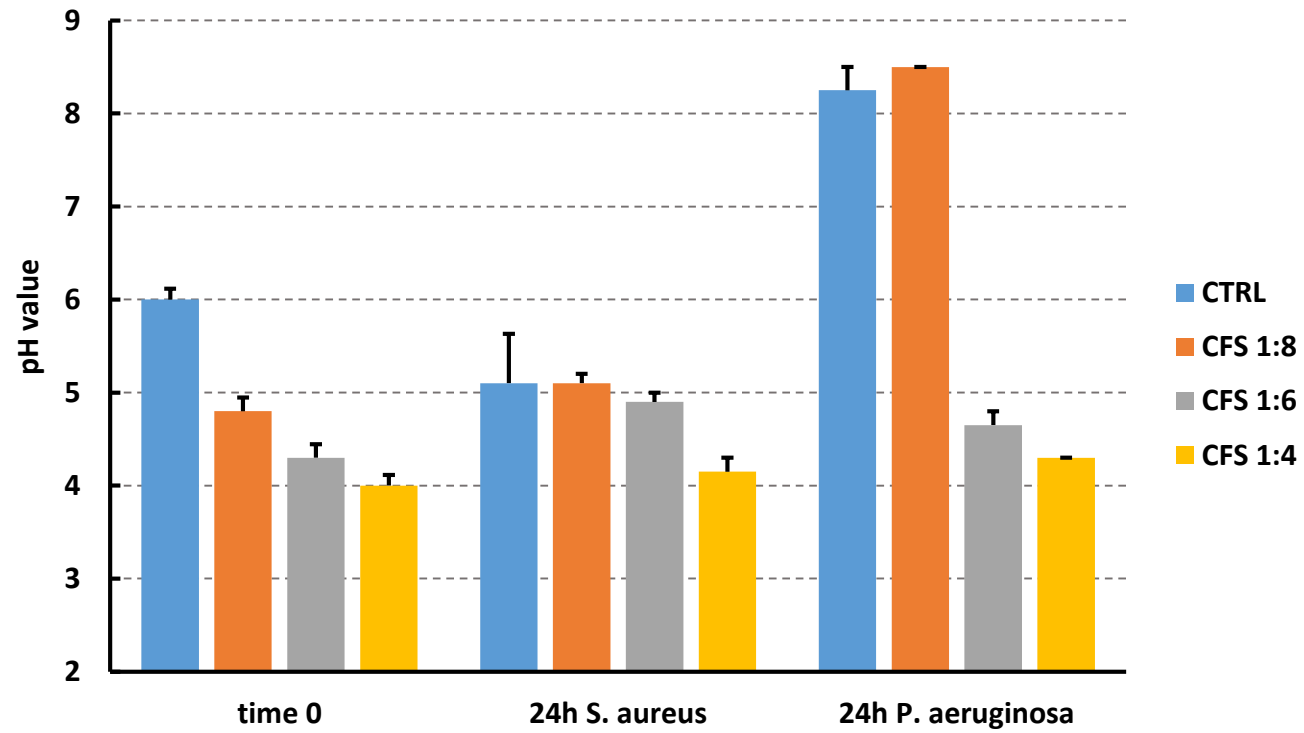

**Supplementary Figure 1.** pH values of different concentrations of CFS diluted in SWF at time 0 and following 24 h culture with pre-formed *S. aureus* W4 or *P. aeruginosa* W4 biofilms. CTRL: control samples incubated with SWF containing sterile MRSB diluted 1:4.
